# Supplementary material for: Clinician knowledge and behaviors related to the 4Ms framework of Age‐Friendly Health Systems
Source: PubMed Central journal article supplement — J Am Geriatr Soc. 2021 Nov 27;70(3):789–800. doi: 10.1111/jgs.17571 (PMC9299469; doi:10.1111/jgs.17571), 2021-11-27
Supplement: JGS-70-789-s001.pdf [file JGS-70-789-s001.pdf]

**Supplementary Table S1. Demographic Characteristics of Patients by the Clinicians' Specialty.**

|                                                                                                    | Physicians<br>(A) | NPs<br>(B) | PAs<br>(C) |
|----------------------------------------------------------------------------------------------------|-------------------|------------|------------|
| <b>Mean Number of Patients Seen (In-Person or Telemedicine) per Month by Clinicians' specialty</b> |                   |            |            |
| <b>Base: Total respondents</b>                                                                     | <b>575</b>        | <b>613</b> | <b>496</b> |
| Total Patients                                                                                     | 291.62 B          | 236.41 AC  | 268.80 B   |
| Total Patients ages 65 or older                                                                    | 146.86 B          | 122.28 A   | 130.50     |
| <b>Mean Percent of Patients Ages 65 or Older Seen per Month by Clinicians' specialty</b>           |                   |            |            |
| <b>Base: Total respondents</b>                                                                     | <b>575</b>        | <b>613</b> | <b>496</b> |
| 65 to 74                                                                                           | 51.98 BC          | 57.17 A    | 57.94 A    |
| 75 to 84                                                                                           | 29.31             | 27.17      | 27.14      |
| 85 to 94                                                                                           | 13.82 BC          | 11.74 A    | 11.52 A    |
| 95 or older                                                                                        | 4.89 BC           | 3.91 A     | 3.40 A     |
| <b>Mean Percent of Patients on Medicaid by Clinicians' specialty</b>                               |                   |            |            |
| <b>Base: Total respondents</b>                                                                     | <b>575</b>        | <b>613</b> | <b>496</b> |
| Total Patients                                                                                     | 26.86 BC          | 40.01 A    | 36.77 A    |
| Total Patients ages 65 or older                                                                    | 28.64 B           | 37.77 A    | 32.91      |
| <b>Mean Percent of Patients Ages 65 or Older by Race/Ethnicity by Clinicians' specialty</b>        |                   |            |            |
| <b>Base: Total respondents</b>                                                                     | <b>575</b>        | <b>613</b> | <b>496</b> |
| White                                                                                              | 75.13             | 56.98      | 58.57      |
| Black or African American                                                                          | 20.05 B           | 24.01 A    | 20.75      |
| Hispanic, Latino/a, Spanish origin                                                                 | 18.33 C           | 18.00 C    | 21.84 AB   |
| Asian                                                                                              | 7.91 BC           | 5.93 A     | 6.52 A     |
| American Indian or Alaska Native                                                                   | 3.89              | 2.89       | 3.00       |
| Native Hawaiian or Other Pacific Islander                                                          | 2.60 BC           | 1.64 A     | 1.46 A     |
| Other (mixed race, etc.)                                                                           | 8.21              | 8.57       | 9.48       |

An uppercase letter next to a data point indicates a significant difference at the 95% confidence level between the subsegments that are being compared (e.g. A next to the number indicates that it is different from Physicians, B – that is different from NPs, and C that it is different from PAs).

**Supplementary Table S2. Race and Ethnicity of Patients by the Clinicians' Primary Practice Location.**

| <b>Mean Percent of Patients Ages 65 or Older by Race/Ethnicity by Physician Primary Practice Location Setting</b> |                      |                         |                               |
|-------------------------------------------------------------------------------------------------------------------|----------------------|-------------------------|-------------------------------|
|                                                                                                                   | <b>Urban<br/>(A)</b> | <b>Suburban<br/>(B)</b> | <b>Rural/Frontier<br/>(C)</b> |
| <b>Base: Physician respondents</b>                                                                                | <b>194</b>           | <b>279</b>              | <b>66</b>                     |
| White                                                                                                             | 42.35 BC             | 56.85 A                 | 63.59 A                       |
| Black or African American                                                                                         | 30.99 BC             | 21.65 AC                | 12.53 AB                      |
| Hispanic, Latino/a, Spanish origin                                                                                | 28.97 B              | 18.03 AC                | 12.85 AB                      |
| Asian                                                                                                             | 8.43 C               | 8.21 C                  | 3.91 AB                       |
| American Indian or Alaska Native                                                                                  | 3.01 C               | 2.72 C                  | 10.83 AB                      |
| Native Hawaiian or Other Pacific Islander                                                                         | 3.88 BC              | 2.06 A                  | 1.79 A                        |
| Other (mixed race, etc.)                                                                                          | 10.80 B              | 8.22 A                  | 7.35                          |
| <b>Mean Percent of Patients Ages 65 or Older by Race/Ethnicity by NP Primary Practice Location Setting</b>        |                      |                         |                               |
|                                                                                                                   | <b>Urban<br/>(A)</b> | <b>Suburban<br/>(B)</b> | <b>Rural/Frontier<br/>(C)</b> |
| <b>Base: NP respondents</b>                                                                                       | <b>194</b>           | <b>243</b>              | <b>143</b>                    |
| White                                                                                                             | 42.37 BC             | 53.27 AC                | 61.85 AB                      |
| Black or African American                                                                                         | 34.07 C              | 25.18 C                 | 20.13 AB                      |
| Hispanic, Latino/a, Spanish origin                                                                                | 28.44 BC             | 20.93 C                 | 16.68 C                       |
| Asian                                                                                                             | 10.08 C              | 7.95 C                  | 2.99 AB                       |
| American Indian or Alaska Native                                                                                  | 3.12 C               | 1.98                    | 1.22 A                        |
| Native Hawaiian or Other Pacific Islander                                                                         | 2.82 B               | 1.46 AC                 | 5.34 B                        |
| Other (mixed race, etc.)                                                                                          | 12.52 C              | 9.42                    | 7.70 A                        |
| <b>Mean Percent of Patients Ages 65 or Older by Race/Ethnicity by PA Primary Practice Location Setting</b>        |                      |                         |                               |
|                                                                                                                   | <b>Urban<br/>(A)</b> | <b>Suburban<br/>(B)</b> | <b>Rural/Frontier<br/>(C)</b> |
| <b>Base: PA respondents</b>                                                                                       | <b>155</b>           | <b>219</b>              | <b>81</b>                     |
| White                                                                                                             | 44.18 BC             | 56.56 AC                | 69.45 AB                      |
| Black or African American                                                                                         | 27.20 BC             | 19.27 AC                | 11.91 AB                      |
| Hispanic, Latino/a, Spanish origin                                                                                | 38.18 BC             | 24.16 A                 | 22.81 A                       |
| Asian                                                                                                             | 9.34 C               | 9.19 C                  | 3.53 AB                       |
| American Indian or Alaska Native                                                                                  | 2.30 C               | 1.97 C                  | 0.89 AB                       |
| Native Hawaiian or Other Pacific Islander                                                                         | 2.68                 | 2.59                    | 5.27                          |
| Other (mixed race, etc.)                                                                                          | 14.10 BC             | 10.15 A                 | 8.81 A                        |

An uppercase letter next to a data point indicates a significant difference at the 95% confidence level between the subsegments that are being compared (e.g. A next to the number indicates that it is different from Urban, B – that is different from Suburban, and C that it is different from Rural/Frontier).
